# Supplementary material for: Direct binding of Talin to Rap1 is required for cell–ECM adhesion in Drosophila
Source: Oxford University Press journal article supplement (doi:10.1242/jcs.225144), 2018-11-16
Supplement: jcs225144supp.pdf [file jcs225144supp.pdf]

A

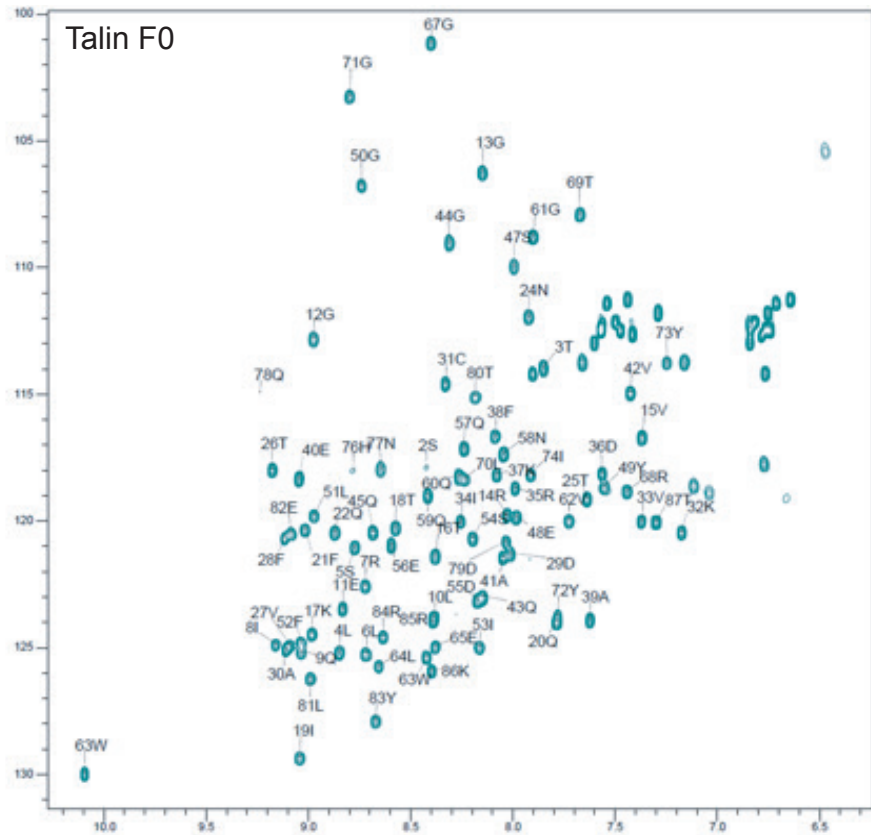

B

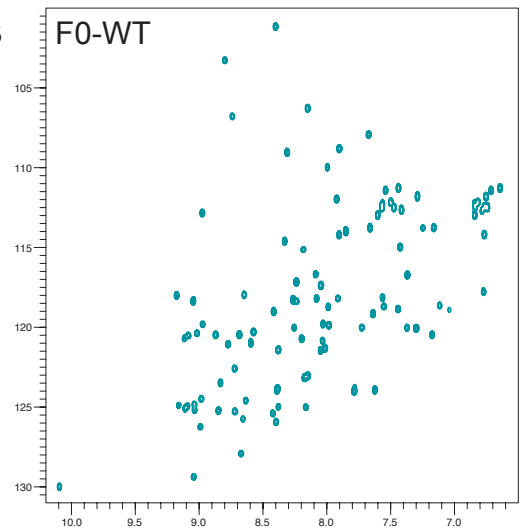

C

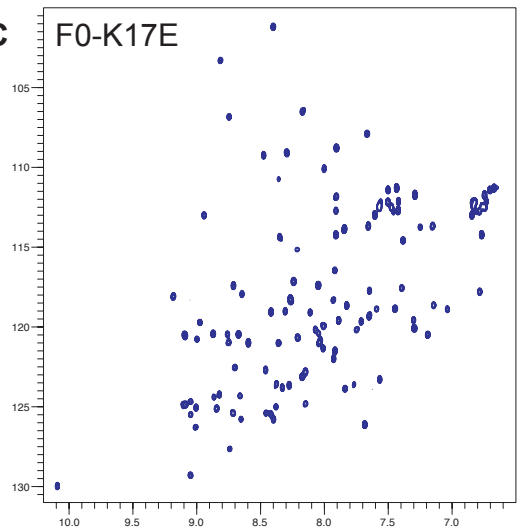

**Figure S1.**

(A) Assigned  $^1\text{H}$ ,  $^{15}\text{N}$  HSQC spectrum of fly Talin F0 (residues 1-87). (B-C)  $^1\text{H}$ ,  $^{15}\text{N}$  HSQC spectra of talin F0 (B) wildtype and (C) K17E.

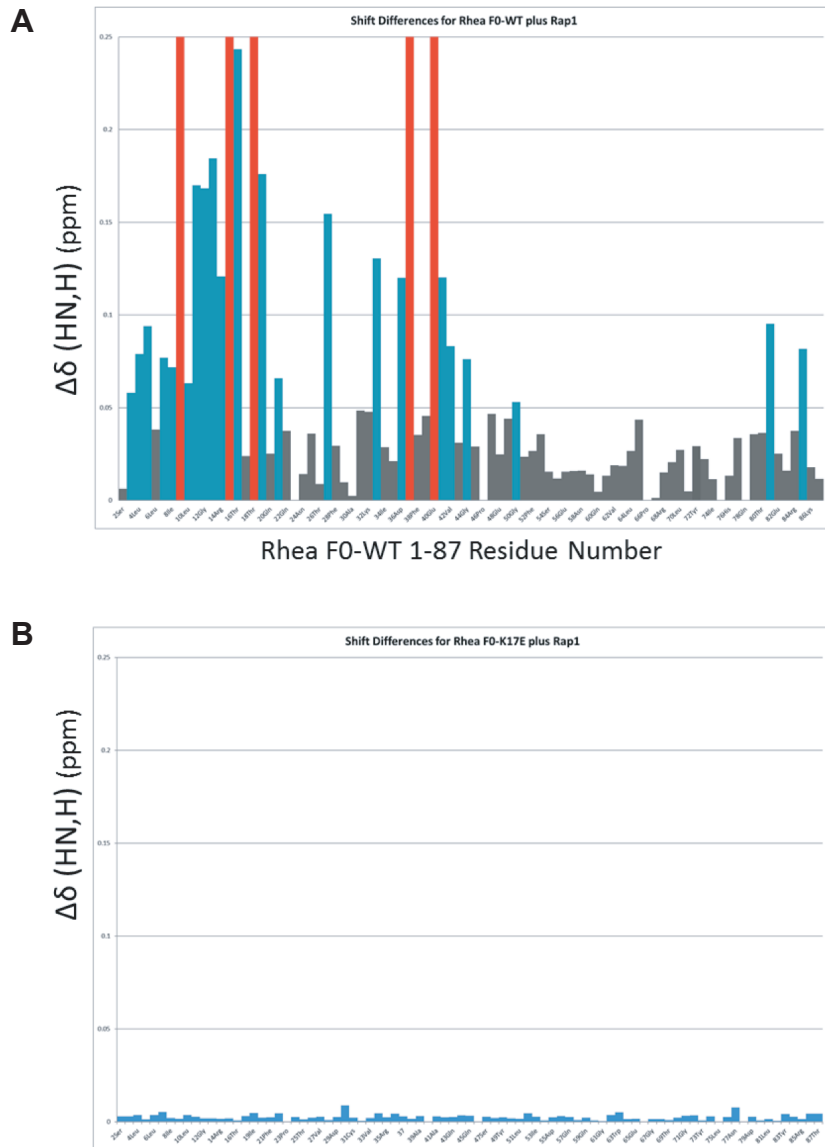

**Figure S2.**

(A-B) Weighted shift map obtained from the  $^1\text{H}$ ,  $^{15}\text{N}$  HSQC spectra of the talin F0 domain with the addition of Rap1b. (A) Wildtype F0 and (B) K17E F0.
